# Supplementary material
Source: publisher figshare collection journal article supplement (https://sage.figshare.com/ndownloader/files/23482568)
Supplement: Supplementary file 1 [file 23482568]

## The usefulness of EULAR nurse role recommendations in China was investigated

1. Your age : \_\_\_\_year
2. Your highest degree : ☐ Technical secondary school ☐ college ☐ Undergraduate course ☐ master ☐ Doctor or above
3. Your job title :
4. Years of experience in the field of rheumatology : \_\_\_\_year
5. Have you received any specialized training ? ☐ yes ☐ no
6. The hospital level you work for :

The following 10 statements are EULAR's recommendations for the role of nurses. Please mark the 10cm line below each statement with your opinion on the extent to which you agree with the recommendation and the feasibility of applying the statement to nurses in China.

If you are not fully agreed to recommend for this (< 10 points) or think that it is not completely feasible in Chinese nurses (score < 10), please state your reasons (the most the right side of the column there are alternative reasons, please fill in the corresponding serial number according to your really idea, if you have alternative reasons outside the idea, please on the line after the “other” ).

|                                                                                                                                                                                                                                                                                                                                                                                                                                                                                                                                                                                                                                                                                                                                                                                                                                                                                                                                                                                                                                                                                                                                                                                                                                                                                                                                                                                                                                                      |                                                                                     |                                                                                                                                                                                                                                                                                                                                                                                                                                                                                                            |
|------------------------------------------------------------------------------------------------------------------------------------------------------------------------------------------------------------------------------------------------------------------------------------------------------------------------------------------------------------------------------------------------------------------------------------------------------------------------------------------------------------------------------------------------------------------------------------------------------------------------------------------------------------------------------------------------------------------------------------------------------------------------------------------------------------------------------------------------------------------------------------------------------------------------------------------------------------------------------------------------------------------------------------------------------------------------------------------------------------------------------------------------------------------------------------------------------------------------------------------------------------------------------------------------------------------------------------------------------------------------------------------------------------------------------------------------------|-------------------------------------------------------------------------------------|------------------------------------------------------------------------------------------------------------------------------------------------------------------------------------------------------------------------------------------------------------------------------------------------------------------------------------------------------------------------------------------------------------------------------------------------------------------------------------------------------------|
| <b>1、 Patients should have access to a nurse for education to improve knowledge of CIA and its management throughout the course of their disease.</b>                                                                                                                                                                                                                                                                                                                                                                                                                                                                                                                                                                                                                                                                                                                                                                                                                                                                                                                                                                                                                                                                                                                                                                                                                                                                                                |                                                                                     | Alternative reasons not fully agreed upon :<br>① From the clinical away from the body<br>② This is not a nurse's job<br>③ There is no need<br>④ The nurse may lack relevant knowledge and skills<br>⑤ The patient does not accept the nurse to assume this role<br>⑥ The nurse was unwilling to do it<br>⑦ Individualized care is better than programmatic care (For the seventh recommendation)<br>⑧ The e purpose of intervention and monitoring should not be to save money (For recommendation no. 10) |
| The degree to which you agree with this recommendation is :<br><br><div style="display: flex; align-items: center;"> <div style="text-align: center; margin-right: 10px;"> <div style="border-bottom: 1px solid black; width: 30px; height: 15px; margin: 0 auto;"></div> <div style="border-bottom: 1px solid black; width: 30px; height: 15px; margin: 0 auto;"></div> <div style="border-bottom: 1px solid black; width: 30px; height: 15px; margin: 0 auto;"></div> <div style="border-bottom: 1px solid black; width: 30px; height: 15px; margin: 0 auto;"></div> <div style="border-bottom: 1px solid black; width: 30px; height: 15px; margin: 0 auto;"></div> <div style="border-bottom: 1px solid black; width: 30px; height: 15px; margin: 0 auto;"></div> <div style="border-bottom: 1px solid black; width: 30px; height: 15px; margin: 0 auto;"></div> <div style="border-bottom: 1px solid black; width: 30px; height: 15px; margin: 0 auto;"></div> <div style="border-bottom: 1px solid black; width: 30px; height: 15px; margin: 0 auto;"></div> <div style="border-bottom: 1px solid black; width: 30px; height: 15px; margin: 0 auto;"></div> </div> <div style="display: flex; justify-content: space-between; width: 100%;"> <span>0 1 2 3 4 5 6 7 8 9 10</span> </div> <div style="display: flex; justify-content: space-between; width: 100%;"> <span>Totally disagree</span> <span>Very much agree with</span> </div> </div> | Not entirely agreed :<br>(Fill in serial number, can choose more)<br>other          |                                                                                                                                                                                                                                                                                                                                                                                                                                                                                                            |
| How feasible do you think this recommendation is :<br><br><div style="display: flex; align-items: center;"> <div style="text-align: center; margin-right: 10px;"> <div style="border-bottom: 1px solid black; width: 30px; height: 15px; margin: 0 auto;"></div> <div style="border-bottom: 1px solid black; width: 30px; height: 15px; margin: 0 auto;"></div> <div style="border-bottom: 1px solid black; width: 30px; height: 15px; margin: 0 auto;"></div> <div style="border-bottom: 1px solid black; width: 30px; height: 15px; margin: 0 auto;"></div> <div style="border-bottom: 1px solid black; width: 30px; height: 15px; margin: 0 auto;"></div> <div style="border-bottom: 1px solid black; width: 30px; height: 15px; margin: 0 auto;"></div> <div style="border-bottom: 1px solid black; width: 30px; height: 15px; margin: 0 auto;"></div> <div style="border-bottom: 1px solid black; width: 30px; height: 15px; margin: 0 auto;"></div> <div style="border-bottom: 1px solid black; width: 30px; height: 15px; margin: 0 auto;"></div> <div style="border-bottom: 1px solid black; width: 30px; height: 15px; margin: 0 auto;"></div> </div> <div style="display: flex; justify-content: space-between; width: 100%;"> <span>0 1 2 3 4 5 6 7 8 9 10</span> </div> <div style="display: flex; justify-content: space-between; width: 100%;"> <span>Not feasible at all</span> <span>Very feasible</span> </div> </div>              | Reasons not entirely feasible:<br>(Fill in serial number, can choose more)<br>other |                                                                                                                                                                                                                                                                                                                                                                                                                                                                                                            |
| <b>2、 Patients should have access to nurse consultations in order to experience improved communication, continuity and satisfaction with care.</b>                                                                                                                                                                                                                                                                                                                                                                                                                                                                                                                                                                                                                                                                                                                                                                                                                                                                                                                                                                                                                                                                                                                                                                                                                                                                                                   |                                                                                     |                                                                                                                                                                                                                                                                                                                                                                                                                                                                                                            |
| The degree to which you agree with this recommendation is :<br><br><div style="display: flex; align-items: center;"> <div style="text-align: center; margin-right: 10px;"> <div style="border-bottom: 1px solid black; width: 30px; height: 15px; margin: 0 auto;"></div> <div style="border-bottom: 1px solid black; width: 30px; height: 15px; margin: 0 auto;"></div> <div style="border-bottom: 1px solid black; width: 30px; height: 15px; margin: 0 auto;"></div> <div style="border-bottom: 1px solid black; width: 30px; height: 15px; margin: 0 auto;"></div> <div style="border-bottom: 1px solid black; width: 30px; height: 15px; margin: 0 auto;"></div> <div style="border-bottom: 1px solid black; width: 30px; height: 15px; margin: 0 auto;"></div> <div style="border-bottom: 1px solid black; width: 30px; height: 15px; margin: 0 auto;"></div> <div style="border-bottom: 1px solid black; width: 30px; height: 15px; margin: 0 auto;"></div> <div style="border-bottom: 1px solid black; width: 30px; height: 15px; margin: 0 auto;"></div> <div style="border-bottom: 1px solid black; width: 30px; height: 15px; margin: 0 auto;"></div> </div> <div style="display: flex; justify-content: space-between; width: 100%;"> <span>0 1 2 3 4 5 6 7 8 9 10</span> </div> <div style="display: flex; justify-content: space-between; width: 100%;"> <span>Totally disagree</span> <span>Very much agree with</span> </div> </div> | Not entirely agreed :<br>(Fill in serial number, can choose more)<br>other          |                                                                                                                                                                                                                                                                                                                                                                                                                                                                                                            |
| How feasible do you think this recommendation is :<br><br><div style="display: flex; align-items: center;"> <div style="text-align: center; margin-right: 10px;"> <div style="border-bottom: 1px solid black; width: 30px; height: 15px; margin: 0 auto;"></div> <div style="border-bottom: 1px solid black; width: 30px; height: 15px; margin: 0 auto;"></div> <div style="border-bottom: 1px solid black; width: 30px; height: 15px; margin: 0 auto;"></div> <div style="border-bottom: 1px solid black; width: 30px; height: 15px; margin: 0 auto;"></div> <div style="border-bottom: 1px solid black; width: 30px; height: 15px; margin: 0 auto;"></div> <div style="border-bottom: 1px solid black; width: 30px; height: 15px; margin: 0 auto;"></div> <div style="border-bottom: 1px solid black; width: 30px; height: 15px; margin: 0 auto;"></div> <div style="border-bottom: 1px solid black; width: 30px; height: 15px; margin: 0 auto;"></div> <div style="border-bottom: 1px solid black; width: 30px; height: 15px; margin: 0 auto;"></div> <div style="border-bottom: 1px solid black; width: 30px; height: 15px; margin: 0 auto;"></div> </div> <div style="display: flex; justify-content: space-between; width: 100%;"> <span>0 1 2 3 4 5 6 7 8 9 10</span> </div> <div style="display: flex; justify-content: space-between; width: 100%;"> <span>Not feasible at all</span> <span>Very feasible</span> </div> </div>              | Reasons not entirely feasible:<br>(Fill in serial number, can choose more)<br>other |                                                                                                                                                                                                                                                                                                                                                                                                                                                                                                            |
| <b>3、 Patients should have access to nurse-led telephone services to enhance continuity of care and to provide ongoing support.</b>                                                                                                                                                                                                                                                                                                                                                                                                                                                                                                                                                                                                                                                                                                                                                                                                                                                                                                                                                                                                                                                                                                                                                                                                                                                                                                                  |                                                                                     |                                                                                                                                                                                                                                                                                                                                                                                                                                                                                                            |

|                                                                                                                                                                                                                                                                                    |  |                                                                                                |                                                                                                                                                                                                                                                                                                                                                                                                                                                                                                                                                                                                                                                                                                          |
|------------------------------------------------------------------------------------------------------------------------------------------------------------------------------------------------------------------------------------------------------------------------------------|--|------------------------------------------------------------------------------------------------|----------------------------------------------------------------------------------------------------------------------------------------------------------------------------------------------------------------------------------------------------------------------------------------------------------------------------------------------------------------------------------------------------------------------------------------------------------------------------------------------------------------------------------------------------------------------------------------------------------------------------------------------------------------------------------------------------------|
| <p>The degree to which you agree with this recommendation is :</p> <div> <div></div> </div> <p>0 1 2 3 4 5 6 7 8 9 10</p> <p>Totally disagree Very much agree with</p> |  | <p>Not entirely agreed :<br/> (Fill in serial number, can choose more)<br/> other</p>          | <p>Alternative reasons not entirely feasible:</p> <p>① Lack of time</p> <p>② There are not enough nurses</p> <p>③ Lack of funds</p> <p>④ Lack of knowledge</p> <p>⑤ lack of education and training</p> <p>⑥ Lack of educational opportunities</p> <p>⑦ Restrictions by laws and regulations</p> <p>⑧ The attitude of the doctor</p> <p>⑨ Attitudes of patients</p> <p>⑩ The attitude of other health professionals</p> <p>⑪ lack of support from your fellow workers</p> <p>⑫ lack of leadership support</p> <p>⑬ nursing education in the lack of (extended nurse role) access to relevant information</p> <p>⑭ lack the nurse role model</p> <p>⑮ there is no need to expand the role of the nurse</p> |
| <p>How feasible do you think this recommendation is :</p> <div> <div></div> </div> <p>0 1 2 3 4 5 6 7 8 9 10</p> <p>Not feasible at all Very feasible</p>              |  | <p>Reasons not entirely feasible:<br/> (Fill in serial number, can choose more)<br/> other</p> |                                                                                                                                                                                                                                                                                                                                                                                                                                                                                                                                                                                                                                                                                                          |
| <p><b>4、</b> Nurses should participate in comprehensive disease management to control disease activity, to reduce symptoms and to improve patient-preferred outcomes.</p>                                                                                                          |  |                                                                                                |                                                                                                                                                                                                                                                                                                                                                                                                                                                                                                                                                                                                                                                                                                          |
| <p>The degree to which you agree with this recommendation is :</p> <div> <div></div> </div> <p>0 1 2 3 4 5 6 7 8 9 10</p> <p>Totally disagree Very much agree with</p> |  | <p>Not entirely agreed :<br/> (Fill in serial number, can choose more)<br/> other</p>          |                                                                                                                                                                                                                                                                                                                                                                                                                                                                                                                                                                                                                                                                                                          |
| <p>How feasible do you think this recommendation is :</p> <div> <div></div> </div> <p>0 1 2 3 4 5 6 7 8 9 10</p> <p>Not feasible at all Very feasible</p>              |  | <p>Reasons not entirely feasible:<br/> (Fill in serial number, can choose more)<br/> other</p> |                                                                                                                                                                                                                                                                                                                                                                                                                                                                                                                                                                                                                                                                                                          |
| <p><b>5、</b> Nurses should identify, assess and address psycho-social issues to minimize the chance of patients' anxiety and depression.</p>                                                                                                                                       |  |                                                                                                |                                                                                                                                                                                                                                                                                                                                                                                                                                                                                                                                                                                                                                                                                                          |
| <p>The degree to which you agree with this recommendation is :</p> <div> <div></div> </div> <p>0 1 2 3 4 5 6 7 8 9 10</p> <p>Totally disagree Very much agree with</p> |  | <p>Not entirely agreed :<br/> (Fill in serial number, can choose more)<br/> other</p>          |                                                                                                                                                                                                                                                                                                                                                                                                                                                                                                                                                                                                                                                                                                          |
| <p>How feasible do you think this recommendation is :</p> <div> <div></div> </div> <p>0 1 2 3 4 5 6 7 8 9 10</p> <p>Not feasible at all Very feasible</p>              |  | <p>Reasons not entirely feasible:<br/> (Fill in serial number, can choose more)<br/> other</p> |                                                                                                                                                                                                                                                                                                                                                                                                                                                                                                                                                                                                                                                                                                          |
| <p><b>6、</b> Nurses should promote self-management skills in order that patients might achieve a greater sense of control, self-efficacy and empowerment.</p>                                                                                                                      |  |                                                                                                |                                                                                                                                                                                                                                                                                                                                                                                                                                                                                                                                                                                                                                                                                                          |
| <p>The degree to which you agree with this recommendation is :</p> <div> <div></div> </div> <p>0 1 2 3 4 5 6 7 8 9 10</p> <p>Totally disagree Very much agree with</p> |  | <p>Not entirely agreed :<br/> (Fill in serial number, can choose more)<br/> other</p>          |                                                                                                                                                                                                                                                                                                                                                                                                                                                                                                                                                                                                                                                                                                          |
| <p>How feasible do you think this recommendation is :</p> <div> <div></div> </div> <p>0 1 2 3 4 5 6 7 8 9 10</p> <p>Not feasible at all Very feasible</p>              |  | <p>Reasons not entirely feasible:<br/> (Fill in serial number, can choose more)<br/> other</p> |                                                                                                                                                                                                                                                                                                                                                                                                                                                                                                                                                                                                                                                                                                          |

|                                                                                                                                                                                                                                                                                                                        |                                                                                           |  |
|------------------------------------------------------------------------------------------------------------------------------------------------------------------------------------------------------------------------------------------------------------------------------------------------------------------------|-------------------------------------------------------------------------------------------|--|
|                                                                                                                                                                                                                                                                                                                        |                                                                                           |  |
| <b>7、</b> Care provided by nurses should be based on programmes and guidelines, taking into account background factors in the country and region in which they are based (Culture, laws and regulations).                                                                                                              |                                                                                           |  |
| The degree to which you agree with this recommendation is :<br><br><div> <div> <div></div><div></div><div></div><div></div><div></div><div></div><div></div><div></div><div></div><div></div> </div> <div>0 1 2 3 4 5 6 7 8 9 10</div> </div> <div> <div>Totally disagree</div> <div>Very much agree with</div> </div> | Not entirely agreed :<br>_____ (Fill in serial number, can choose more)<br>other          |  |
| How feasible do you think this recommendation is :<br><br><div> <div> <div></div><div></div><div></div><div></div><div></div><div></div><div></div><div></div><div></div><div></div> </div> <div>0 1 2 3 4 5 6 7 8 9 10</div> </div> <div> <div>Not feasible at all</div> <div>Very feasible</div> </div>              | Reasons not entirely feasible:<br>_____ (Fill in serial number, can choose more)<br>other |  |
| <b>8、</b> Nurses should have access to and undertake continuous education in order to improve and maintain knowledge and skills.                                                                                                                                                                                       |                                                                                           |  |
| The degree to which you agree with this recommendation is :<br><br><div> <div> <div></div><div></div><div></div><div></div><div></div><div></div><div></div><div></div><div></div><div></div> </div> <div>0 1 2 3 4 5 6 7 8 9 10</div> </div> <div> <div>Totally disagree</div> <div>Very much agree with</div> </div> | Not entirely agreed :<br>_____ (Fill in serial number, can choose more)<br>other          |  |
| How feasible do you think this recommendation is :<br><br><div> <div> <div></div><div></div><div></div><div></div><div></div><div></div><div></div><div></div><div></div><div></div> </div> <div>0 1 2 3 4 5 6 7 8 9 10</div> </div> <div> <div>Not feasible at all</div> <div>Very feasible</div> </div>              | Reasons not entirely feasible:<br>_____ (Fill in serial number, can choose more)<br>other |  |
| <b>9、</b> Nurses should be encouraged to undertake extended roles after specialized training and according to national regulations.                                                                                                                                                                                    |                                                                                           |  |
| The degree to which you agree with this recommendation is :<br><br><div> <div> <div></div><div></div><div></div><div></div><div></div><div></div><div></div><div></div><div></div><div></div> </div> <div>0 1 2 3 4 5 6 7 8 9 10</div> </div> <div> <div>Totally disagree</div> <div>Very much agree with</div> </div> | Not entirely agreed :<br>_____ (Fill in serial number, can choose more)<br>other          |  |
| How feasible do you think this recommendation is :<br><br><div> <div> <div></div><div></div><div></div><div></div><div></div><div></div><div></div><div></div><div></div><div></div> </div> <div>0 1 2 3 4 5 6 7 8 9 10</div> </div> <div> <div>Not feasible at all</div> <div>Very feasible</div> </div>              | Reasons not entirely feasible:<br>_____ (Fill in serial number, can choose more)<br>other |  |
| <b>10、</b> Nurses should carry out interventions and monitoring as part of comprehensive disease management in order to achieve cost savings.                                                                                                                                                                          |                                                                                           |  |
| The degree to which you agree with this recommendation is :<br><br><div> <div> <div></div><div></div><div></div><div></div><div></div><div></div><div></div><div></div><div></div><div></div> </div> <div>0 1 2 3 4 5 6 7 8 9 10</div> </div> <div> <div>Totally disagree</div> <div>Very much agree with</div> </div> | Not entirely agreed :<br>_____ (Fill in serial number, can choose more)<br>other          |  |

How feasible do you think this recommendation is :

|   |   |   |   |   |   |   |   |   |   |    |
|---|---|---|---|---|---|---|---|---|---|----|
|   |   |   |   |   |   |   |   |   |   |    |
| 0 | 1 | 2 | 3 | 4 | 5 | 6 | 7 | 8 | 9 | 10 |

Not feasible at all

Very feasible

Reasons not entirely feasible:

(Fill in serial number, can  
choose more)  
other
